# Supplementary material for: High-Throughput Platform for Detection of Neutralizing Antibodies Using Flavivirus Reporter Replicon Particles
Source: MDPI journal article supplement (doi:10.3390/v14020346), 2022-02-08
Supplement: s1 [file s1]

**Table S1:** List of primers used in the study

| Name    | Sequence (5'-3')                                                                                |
|---------|-------------------------------------------------------------------------------------------------|
| Bo88    | TTGGAGAGCCATGGGCACTC                                                                            |
| Bo286   | GTTATTGTCTCATGAGCGGATAC                                                                         |
| Bo905   | TGCTCTAGAGCCGGCATGTCTGGTCGTAAAGCTCAGGGAAAAACCTG                                                 |
| Bo907   | GGCGCTGCGGGTCGTGGGGCGGGCGGCGCCGCTCAACGGCGTTTCCTTGAGGACAAT<br>CCT                                |
| Bo906   | AGGATTGTCTCAAGGAAACGCCGTTGAGCGGGCCGCCCGCCCCACGACCCGCAG<br>CGCC                                  |
| Bo908   | CATTATGCACATCAGTTCCTCGGAAG                                                                      |
| Bo909   | GCTCTAGAGCCACCATGATGACCGAATACAAGCCCACGGTGC                                                      |
| Bo910   | GGGCCCCGGGATTTTCTCCACGTCCCCGCATGTTAGAAGACTTCCCCTGCCCTCGGCTC<br>TGGCACCGGGCTTGCGGGTCATGCAC       |
| Bo911   | AGAGCCGAGGGCAGGGGAAGTCTTCTAACATGCGGGGACGTGGAGGAAAATCCCGGG<br>CCCTCCCATGATGTTCTGACTGTGCAAT       |
| Bo912   | ACTGTAACGCGTCTACGCCCCAACTCCTAGAGACAAAAACATC                                                     |
| Bo1031  | ACAACGCGTCTATGCCTGAACCATGACTCCTAGGTACAGTG                                                       |
| Bo1047  | TTACCTGCAGGATCAACAATGACATTGCTGTGCTTGATTCC                                                       |
| Bo1048  | TAACGCGTTTATGCGTGAAGTGTGAAACCCAGAAACAG                                                          |
| Bo1051  | TTACCTGCAGGAACATCGCTCTGTCTCATGATGATGTTACC                                                       |
| Bo1052  | TAACGCGTTTAAGCTTGACACCGCTCCCAGATAG                                                              |
| Bo1061  | CCGGGCCTGCAGGATCCGTGACCATGCTCCTTATGCTGCTG                                                       |
| Bo1158  | GCGTCAATATGGTACGACGAGGAGTACGTAACATGGGAGTCAAAGTTCTGTTTGCCCT<br>GATCTGC                           |
| Bo1159  | GCAGATCAGGGCAAACAGAACTTTGACTCCCATg <sub>tt</sub> aCG <sub>t</sub> ACTCCTCGTCGTACCATATT<br>GACGC |
| Bo1160  | AGATCAAGGGGGCCGGTGGTGACGGAAGCGGAGCTACTAACTTCAGCC                                                |
| Bo1161  | GGCTGAAGTTAGTAGTCCGCTTCCGTCACCACCGGCCCCCTTGATCT                                                 |
| Bo1555  | GAACCTGCAGGCGCAGATACTAGTGTGGAATTG                                                               |
| Bo1556  | TTACGCGTCTAAGCAGAGACGGCTGTGGATAAGAAG                                                            |
| Bo1557  | TGATCCTGCAGGAGGAAAGACCGGAATTGCAGTCA                                                             |
| Bo1558  | TAGTACGCGTCTAAGCGTGCACGTTACGGAGAGGAA                                                            |
| Bo1562  | TAGTACGCGTCTAAGCAGAAACAGCCGTGGAGAGGAAG                                                          |
| Bo1564  | TAGTACGCGTCTACGCCCCACTCCAAGGGTCATGGCC                                                           |
| Bo1566  | TGATCCTGCAGGATCAGCGACGGATTGGATGAGCTGGT                                                          |
| Bo1571  | TGATCCTGCAGGACGTGGCGCAGACACCAGCATCGGAA                                                          |
| CF1_D2f | CAAGACCTGCAGGATCTGCAGGCATGATCATTATGCT                                                           |
| CF2-D2r | CATTAACGCGTCTAGGCCTGCACCATGACTCCCAAATAC                                                         |
